# Supplementary material
Source: PubMed Central journal article supplement (PMC3386099)
Supplement: 1207314109_pnas.201207314SI.pdf [file 1207314109_pnas.201207314SI.pdf]

# Supporting Information

Auerbach et al. 10.1073/pnas.1207314109

## SI Materials and Methods

**Cells.** The human cell lines MT-2, PM1, Sup-T1, and MAGI-CCR5 were obtained from the National Institutes of Health-AIDS Research and Reference Reagent Program (NIH-ARRRP). Primary human CD4<sup>+</sup> T cells were purified from the peripheral blood of healthy blood donors using immunomagnetic beads (Stem Cell Technologies) and stimulated with phytohemagglutinin (PHA; Sigma) and recombinant human interleukin-2 (IL-2; Roche Applied Science) in complete RPMI medium (Invitrogen) containing 10% (vol/vol) FBS (HyClone, Thermo Scientific), glutamine at 2 mM, streptomycin at 50 µg/mL, and penicillin at 100 units/mL for 72 h before infection. Primary human macrophages were differentiated in vitro from peripheral blood as follows: total peripheral blood mononuclear cells (PBMCs) obtained from healthy blood donors were resuspended in RPMI medium supplemented with 20% FBS and 10% human AB serum (Invitrogen) and cultured for 6 d at 37 °C at a concentration of  $1 \times 10^6$  cells/cm<sup>2</sup> in 24-well tissue culture plates (Nunc). Nonadherent cells were then removed by extensive washing with prewarmed culture medium. Adherent macrophage cultures contained >90% CD14<sup>+</sup> cells, as assessed by flow cytometry.

**Proteins and Antibodies.** Recombinant human CXCL4 (PF-4), CCL3 (MIP-1 $\alpha$ ), CCL5 (RANTES), CXCL11 (I-TAC), and CXCL12 (SDF-1) were obtained from R&D Systems; native CXCL4 derived from activated human platelets was obtained from Calbiochem. Molar values were calculated on the basis of the molecular weight of the monomeric molecules. Recombinant 4-domain soluble CD4 was obtained from Progenics. Recombinant wild-type or mutated (D368R) gp120 produced in mammalian cells was a kind gift of John R. Mascola (Vaccine Research Center, National Institute of Allergy and Infectious Diseases, Bethesda, MD). Peptide T20 was obtained from the NIH-ARRRP. Monoclonal antibodies (mAbs) to human CXCL4 (nos. 7951 and 7952), polyclonal goat IgG antibody to human CXCL4, and purified goat IgG were obtained from R&D Systems. Goat antisera PB1 and PB1 Sub7 raised against HIV-1 gp120 outer-domain fragments, as well as human mAbs to various regions of HIV-1 gp120 (2G12, IgG1b12, F105, 654-D, and A1G8) were obtained from the NIH-ARRRP; mAbs VRC01, VRC03, VRCPG04, and VRCCH31 were a gift from Dr. John R. Mascola; mAb 412D was a gift from James E. Robinson (Tulane University Medical Center, New Orleans, LA). Neutralizing mAb to human CD4 (clone RPA-T4) was obtained from eBioscience; fluorochrome-conjugated mAbs to human CD4, CXCR3, CXCR4, and CCR5 were obtained from BD Biosciences.

**Coimmunoprecipitation Assays.** To evaluate the direct interaction between CXCL4 and HIV-1 envelope glycoproteins, we performed coimmunoprecipitation experiments using native, trimeric viral envelope expressed on the surface of persistently infected PM1 cells. Five million PM1 cells persistently infected with HIV IIIB (X4) were washed with 20 mM of Hepes buffer, 0.9% NaCl, pH 7.3 and incubated with 5 µM recombinant human CXCL4 or CCL3 (both from R&D Systems) for 1 h at room temperature in Hepes buffer. The cells were then washed twice with Hepes buffer to remove the unbound chemokines and treated with 2 mM of the cross-linking agent DTSSP (Pierce) in Hepes buffer; after 30 min at room temperature, the cross-linking reaction was stopped by addition of 50 mM Tris/HCl buffer pH 7.4. The cells were then washed three times with PBS and incubated with polyclonal rabbit antihuman CXCL4 IgG antibody (Peprotech)

or goat antihuman CCL3 IgG antibody (R&D Systems) at room temperature; after 30 min, the cells were washed twice with PBS, lysed with Triton X-100 0.5% for 10 min on ice, and then spun. The pelleted material was treated with RIPA lysis buffer (Sigma) for 20 min on ice. After spinning, the supernatant was incubated with magnetic beads coated with protein G (Invitrogen) under continuous rotation for 1 h at 4 °C. The beads were then washed three times with RIPA buffer and dissolved in SDS loading buffer containing 10% 2-mercaptoethanol. The samples were resolved by SDS electrophoresis on 8% Tris-glycine acrylamide gels, transferred to nitrocellulose membranes, and analyzed by Western blot using the anti-gp120 mAb B13, directed against a linear epitope in the protein N terminus (a kind gift of George K. Lewis, Institute of Human Virology, Baltimore, MD). Following incubation with horseradish peroxidase-conjugated rabbit anti-mouse IgG antibody (Pierce), the samples were visualized with the supersignal West chemiluminescent kit (Thermo Scientific). To further evaluate the direct interaction between CXCL4 and HIV-1 gp120, coimmunoprecipitation was also performed using recombinant wild-type or mutated (D368R) monomeric gp120 derived from isolate YU2 (a kind gift of John R. Mascola) after cross-linking of CXCL4 or CCL3 using the zero-length two-step method (Pierce). Recombinant human CXCL4 or CCL3, each at 2.5 µM, were separately incubated with EDC at 6 mM and sulfo-NHS at 15 mM in 10 mM Mes, 50 mM NaCl, pH 6.0, for 30 min at room temperature. The first step of the reaction was stopped with 2-mercaptoethanol at 200 mM for 20 min at room temperature. Gp120 was added at 20 nM and incubated for 2 h at room temperature. The cross-linking reaction was quenched by addition of hydroxylamine at a final concentration of 10 mM and incubation for 15 min at 25 °C. Molecular complexes were immunoprecipitated by polyclonal rabbit anti-CXCL4 or goat anti-CCL3 antibodies prebound to magnetic beads and then washed three times with RIPA buffer. The samples were resolved by SDS electrophoresis on 12% Tris-glycine acrylamide gels, transferred to nitrocellulose membranes, and analyzed by Western blot using mAb B13 (a gift of G. K. Lewis).

**Receptor Down-modulation Assay.** Expression of CD4, CCR5, CXCL3, and CXCR4 was evaluated on primary CD4<sup>+</sup> T cells after treatment with CXCL4. The cells were incubated with recombinant human CXCL4 at the concentration of 640 nM for 30 min, 2 h, or 18 h at 37 °C. Positive control cultures were incubated in the presence of PMA (50 ng/mL), CCL5, CXCL11, or CXCL12 (each at 100 ng/mL). The expression of the four receptors was evaluated by flow cytometry using specific fluorochrome-labeled mAbs (all from BD Bioscience).

**Enzyme Immunoassay for CD4 Binding.** Binding of CD4 to CXCL4 was evaluated by enzyme immunoassay. Briefly, 96-well flat-bottom plates were coated with recombinant human CXCL4 at 2 µg/mL in 100 µL of PBS overnight at 4 °C and blocked with casein 0.5% (wt/vol); 4-domain soluble CD4 (sCD4) was added in the liquid phase at 1 µg/mL and then revealed with the anti-CD4 mAbs OKT4 (specific for domains D3 and D4) or RPA-T4 (specific for the gp120-binding site in domain D1). An anti-CXCL4 mAb (no. 7951) was used as a positive control. As a further control, binding of sCD4 to immobilized recombinant HIV-1 gp120 derived from isolate IIIB (X4) was tested. Background binding was measured by testing all of the reagents on uncoated plates treated only with the blocking agent (casein).



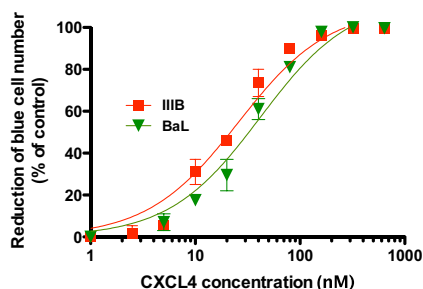

**Fig. S3.** Dose-dependent inhibition of single-cycle HIV-1 infection in MAGI-CCR5 cells by two biological variants of the virus (IIIB, X4; BaL, R5). MAGI-CCR5 cells express endogenous CXCR4 and recombinant human CD4 and CCR5, and contain a *LacZ* reporter gene under the control of the HIV-1 LTR. Enumeration of blue cells after 48 h denotes the completion of a single infectious cycle of HIV-1. To reduce interexperimental variability, data were normalized with respect to the number of blue cells detected in control cultures (not treated with inhibitors).

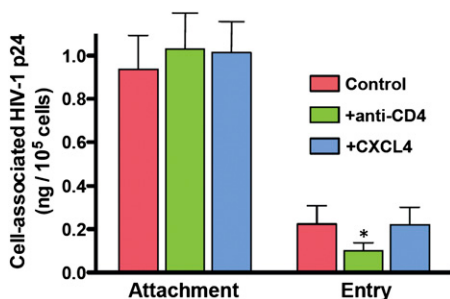

**Fig. S4.** Effects of CXCL4 on cell attachment and entry of a CXCL4-insensitive HIV-1 isolate (07USLR, X4). The test was performed as described in *SI Materials and Methods*. HIV-1 isolate 07USLR was also insensitive to the inhibitory effects of the anti-CD4 mAb on virion attachment (*Left*), but not entry (*Right*), suggesting the involvement of cell surface structures other than CD4 in the initial interaction of this virus with CD4<sup>+</sup> T cells. Data represent mean values ( $\pm$ SD) from three independent experiments. \* $P < 0.05$  vs. untreated control by paired two-tailed Student *t* test.



**Table S1. Effect of recombinant human CXCL4 against HIV-2, simian immunodeficiency virus (SIV), and human herpesvirus (HHV)-6A**

| Virus                           | Strain     | CXCL4 IC <sub>50</sub> , $\mu$ M |
|---------------------------------|------------|----------------------------------|
| HIV-2*                          | CBL-20     | >1                               |
| HIV-2*                          | CDC310342  | >1                               |
| HIV-2*                          | 7924A      | >1                               |
| SIV <sub>sm</sub> <sup>†</sup>  | smE660/307 | >1                               |
| SIV <sub>mac</sub> <sup>†</sup> | mac251     | >1                               |
| SIV <sub>mac</sub> <sup>†</sup> | mac251/745 | >1                               |
| HHV-6A                          | GS         | >1                               |

<sup>†</sup>Primary SIV strains passaged in vivo in macaques (mac251 and mac251/745 in *M. mulatta*; smE660/307 in *M. nemestrina*).
